# Supplementary material for: Polysubstance addiction patterns among 7,989 individuals with cocaine use disorder
Source: PubMed Central journal article supplement — iScience. 2023 Jul 16;26(8):107336. doi: 10.1016/j.isci.2023.107336 (PMC10405253; doi:10.1016/j.isci.2023.107336), 2023-07-16
Supplement: mmc1.pdf [file mmc1.pdf]

**iScience, Volume 26**

**Supplemental information**

**Polysubstance addiction patterns**

**among 7,989 individuals with cocaine use disorder**

**Brendan Stiltner, Robert H. Pietrzak, Daniel S. Tylee, Yaira Z. Nunez, Keyrun Adhikari, Henry R. Kranzler, Joel Gelernter, and Renato Polimanti**

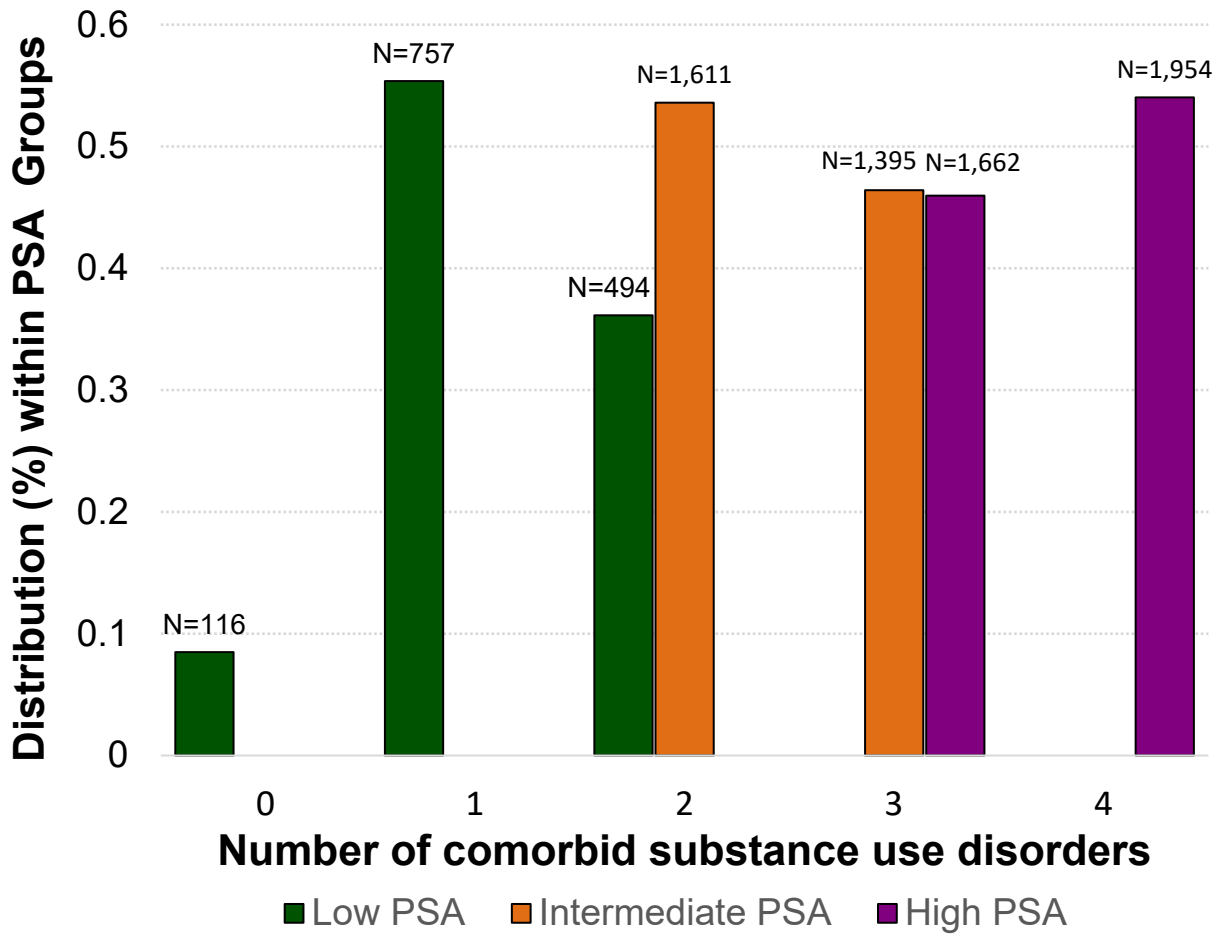

**Figure S1. Count of Comorbid Substance use disorders in each subgroup, related to Table 1.**  
 Note. PSA = Polysubstance addiction.

**Table S1. Prevalence of Other Substance dependencies in Sample, related to STAR Methods.**

| <b>Substance dependence</b> | <b>Count, n (%)</b> |
|-----------------------------|---------------------|
| Speedballs                  | 932 (12)            |
| Sedatives                   | 794 (10)            |
| Stimulants                  | 588 (7)             |
| Hallucinogens               | 227 (3)             |
| Ecstasy                     | 179 (2)             |
| PCP                         | 167 (2)             |
| Solvents                    | 18 (0)              |
| Inhalants                   | 9 (0)               |
| Prescription drugs          | 6 (0)               |
| Amphetamines                | 5 (0)               |
| Ketamine                    | 5 (0)               |
| Nitrous Oxide               | 4 (0)               |

PCP = Phencyclidine.

**Table S2. SUD distribution in African Americans and European Americans, related to Table 1.**

| <b>Subgroup</b>                      | <b>SUD</b> | <b>European Americans</b> | <b>African Americans</b> |
|--------------------------------------|------------|---------------------------|--------------------------|
| Full CoUD<br>Sample, n (%)           | AUD        | 2514 (87)                 | 2999 (80)                |
|                                      | CaUD       | 1836 (63)                 | 1966 (52)                |
|                                      | OUD        | 2041 (70)                 | 1055 (28)                |
|                                      | TUD        | 2580 (89)                 | 3162 (84)                |
| Low-PSA<br>Subgroup, n (%)           | AUD        | 124 (34)                  | 225 (29)                 |
|                                      | CaUD       | 22 (6)                    | 53 (7)                   |
|                                      | OUD        | 220 (61)                  | 193 (25)                 |
|                                      | TUD        | 181 (50)                  | 379 (49)                 |
| Intermediate- PSA<br>Subgroup, n (%) | AUD        | 887 (85)                  | 1276 (86)                |
|                                      | CaUD       | 301 (29)                  | 415 (28)                 |
|                                      | OUD        | 705 (68)                  | 391 (26)                 |
|                                      | TUD        | 886 (86)                  | 1285 (86)                |
| High-PSA<br>Subtype, n (%)           | AUD        | 1513 (100)                | 1498 (100)               |
|                                      | CaUD       | 1513 (100)                | 1498 (100)               |
|                                      | OUD        | 1116 (74)                 | 471 (31)                 |
|                                      | TUD        | 1513 (100)                | 1498 (100)               |

SUD = Substance use disorder, AUD = Alcohol use disorder, CaUD = Cannabis use disorder, OUD = Opioid use disorder, TUD = Tobacco use disorder.

**Table S3. Fit Statistics for Latent Class Models of SUD Criteria in the Low-PSA Subgroup. The best fits are highlighted in yellow. Related to Figure 1.**

| SUD  | # of classes | Log-likelihood  | df          | AIC             | BIC             | BLRT        | Entropy     |
|------|--------------|-----------------|-------------|-----------------|-----------------|-------------|-------------|
| AUD  | 2            | -4432.54        | 1344        | 8911.07         | 9031.14         | 0.00        | 0.97        |
|      | <b>3</b>     | <b>-4163.08</b> | <b>1332</b> | <b>8396.16</b>  | <b>8578.88</b>  | <b>0.04</b> | <b>0.95</b> |
|      | 4            | -4137.38        | 1320        | 8368.76         | 8614.12         | 0.06        | 0.92        |
|      | 5            | -4121.95        | 1308        | 8361.91         | 8669.91         | 0.06        | 0.93        |
| CaUD | <b>2</b>     | <b>-2063.42</b> | <b>1344</b> | <b>4172.84</b>  | <b>4292.91</b>  | <b>0.20</b> | <b>0.98</b> |
|      | 3            | -2046.41        | 1332        | 4162.82         | 4345.53         | 0.10        | 0.98        |
|      | 4            | -2033.66        | 1320        | 4161.33         | 4406.68         | 0.14        | 0.98        |
| OUD  | 2            | -3607.58        | 1344        | 7261.16         | 7381.23         | 0.00        | 0.99        |
|      | <b>3</b>     | <b>-3265.57</b> | <b>1332</b> | <b>6601.14</b>  | <b>6783.86</b>  | <b>0.00</b> | <b>0.96</b> |
|      | 4            | -3226.73        | 1320        | 6547.47         | 6792.82         | 0.04        | 0.91        |
|      | 5            | -3195.09        | 1308        | 6508.18         | 6816.18         | 0.06        | 0.92        |
| TUD  | 2            | -5148.40        | 492         | 10406.80        | 10505.99        | 0.00        | 0.92        |
|      | 3            | -5062.57        | 482         | 10183.14        | 10334.53        | 0.00        | 0.87        |
|      | <b>4</b>     | <b>-5025.74</b> | <b>472</b>  | <b>10129.48</b> | <b>10333.07</b> | <b>0.16</b> | <b>0.85</b> |
|      | 5            | -5013.09        | 462         | 10124.18        | 10379.97        | 0.18        | 0.81        |

SUD = Substance use disorder, df = Degrees of freedom, AIC = Akaike information criterion, BIC = Bayesian information criterion, BLRT = Bootstrap likelihood ratio test, AUD = Alcohol use disorder, CaUD = Cannabis use disorder, OUD = Opioid use disorder, TUD = Tobacco use disorder.

**Table S4. Fit Statistics for Latent Class Models of SUD Criteria in the Intermediate-PSA Subgroup. The best fits are highlighted in yellow. Related to Figure 1.**

| SUD  | # of classes | Log-likelihood   | df          | AIC             | BIC             | BLRT        | Entropy     |
|------|--------------|------------------|-------------|-----------------|-----------------|-------------|-------------|
| AUD  | 2            | -16602.02        | 2024        | 33250.04        | 33388.23        | 0.00        | 0.91        |
|      | 3            | -15959.66        | 2012        | 31989.33        | 32199.62        | 0.00        | 0.83        |
|      | 4            | -15796.07        | 2000        | 31686.13        | 31968.53        | 0.00        | 0.77        |
|      | <b>5</b>     | <b>-15736.55</b> | <b>1988</b> | <b>31591.10</b> | <b>31945.60</b> | <b>0.00</b> | <b>0.73</b> |
|      | 6            | -15702.00        | 1976        | 31546.00        | 31972.59        | 0.02        | 0.70        |
| CaUD | 2            | -10428.86        | 2024        | 20903.72        | 21041.91        | 0.00        | 0.94        |
|      | 3            | -10182.42        | 2012        | 20434.84        | 20645.13        | 0.00        | 0.89        |
|      | <b>4</b>     | <b>-10118.68</b> | <b>2000</b> | <b>20331.37</b> | <b>20613.76</b> | <b>0.00</b> | <b>0.88</b> |
|      | 5            | -10088.93        | 1988        | 20295.85        | 20650.35        | 0.02        | 0.87        |
| OUD  | 2            | -8514.57         | 2024        | 17075.14        | 17213.33        | 0.00        | 0.99        |
|      | 3            | -7635.17         | 2012        | 15340.34        | 15550.63        | 0.00        | 0.97        |
|      | 4            | -7555.21         | 2000        | 15204.41        | 15486.80        | 0.00        | 0.93        |
|      | <b>5</b>     | <b>-7480.84</b>  | <b>1988</b> | <b>15079.68</b> | <b>15434.17</b> | <b>0.00</b> | <b>0.94</b> |
|      | 6            | -7451.72         | 1976        | 15045.44        | 15472.03        | 0.06        | 0.89        |
| TUD  | 2            | -14690.76        | 492         | 29419.51        | 29533.67        | 0.00        | 0.84        |
|      | 3            | -14252.09        | 482         | 28562.17        | 28736.42        | 0.00        | 0.79        |
|      | 4            | -14144.11        | 472         | 28366.22        | 28600.55        | 0.00        | 0.77        |
|      | <b>5</b>     | <b>-14073.90</b> | <b>462</b>  | <b>28245.79</b> | <b>28540.20</b> | <b>0.18</b> | <b>0.68</b> |
|      | 6            | -14058.35        | 452         | 28234.69        | 28589.18        | 0.54        | 0.70        |

SUD = Substance use disorder, df = Degrees of freedom, AIC = Akaike information criterion, BIC = Bayesian information criterion, BLRT = Bootstrap likelihood ratio test, AUD = Alcohol use disorder, CaUD = Cannabis use disorder, OUD = Opioid use disorder, TUD = Tobacco use disorder.

**Table S5. Fit Statistics for Latent Class Models of SUD Criteria in the High-PSA Subgroup. The best fits are highlighted in yellow. Related to Figure 1.**

| SUD  | # of classes | Log-likelihood   | df          | AIC             | BIC             | BLRT        | Entropy     |
|------|--------------|------------------|-------------|-----------------|-----------------|-------------|-------------|
| AUD  | 2            | -18912.64        | 2024        | 37871.28        | 38013.72        | 0.00        | 0.85        |
|      | 3            | -18570.65        | 2012        | 37211.29        | 37428.05        | 0.00        | 0.74        |
|      | 4            | -18483.11        | 2000        | 37060.22        | 37351.29        | 0.00        | 0.72        |
|      | <b>5</b>     | <b>-18421.15</b> | <b>1988</b> | <b>36960.31</b> | <b>37325.70</b> | <b>0.00</b> | <b>0.72</b> |
|      | 6            | -18390.51        | 1976        | 36923.02        | 37362.74        | 0.00        | 0.73        |
| CaUD | 2            | -24867.86        | 2024        | 49781.72        | 49924.16        | 0.00        | 0.75        |
|      | 3            | -24618.05        | 2012        | 49306.11        | 49522.87        | 0.00        | 0.75        |
|      | 4            | -24476.60        | 2000        | 49047.20        | 49338.27        | 0.00        | 0.69        |
|      | <b>5</b>     | <b>-24402.75</b> | <b>1988</b> | <b>48923.49</b> | <b>49288.89</b> | <b>0.00</b> | <b>0.74</b> |
|      | 6            | -24347.38        | 1976        | 48836.76        | 49276.47        | 0.00        | 0.70        |
| OUD  | 2            | -10770.16        | 2024        | 21586.31        | 21728.75        | 0.00        | 0.99        |
|      | 3            | -9617.73         | 2012        | 19305.46        | 19522.22        | 0.00        | 0.96        |
|      | 4            | -9461.16         | 2000        | 19016.32        | 19307.40        | 0.00        | 0.91        |
|      | <b>5</b>     | <b>-9351.70</b>  | <b>1988</b> | <b>18821.40</b> | <b>19186.80</b> | <b>0.00</b> | <b>0.92</b> |
|      | 6            | -9312.35         | 1976        | 18766.71        | 19206.42        | 0.02        | 0.90        |
| TUD  | 2            | -16817.71        | 492         | 33673.43        | 33791.10        | 0.00        | 0.65        |
|      | 3            | -16695.83        | 482         | 33449.65        | 33629.25        | 0.00        | 0.60        |
|      | <b>4</b>     | <b>-16621.40</b> | <b>472</b>  | <b>33320.80</b> | <b>33562.33</b> | <b>0.00</b> | <b>0.59</b> |
|      | 5            | -16584.13        | 462         | 33266.25        | 33569.71        | 0.00        | 0.60        |
|      | 6            | -16571.11        | 452         | 33260.22        | 33625.62        | 0.00        | 0.60        |

SUD = Substance use disorder, df = Degrees of freedom, AIC = Akaike information criterion, BIC = Bayesian information criterion, BLRT = Bootstrap likelihood ratio test, AUD = Alcohol use disorder, CaUD = Cannabis use disorder, OUD = Opioid use disorder, TUD = Tobacco use disorder.

**Table S6. Cocaine use disorder criteria endorsed in the Full-CoUD sample and in the CoUD Subgroups, related to Figure 1.**

| <b>Criterion, n (%)</b>    | <b>Full-CoUD sample (n=7989)</b> | <b>Low-PSA Subgroup (n=1367)</b> | <b>Intermediate-PSA Subgroup (n=3006)</b> | <b>High-PSA Subgroup (n=3616)</b> |
|----------------------------|----------------------------------|----------------------------------|-------------------------------------------|-----------------------------------|
| <b>Hazardous Use</b>       | 4733 (59)                        | 540 (40)                         | 1664 (55)                                 | 2529 (70)                         |
| <b>Social Problems</b>     | 6824 (85)                        | 1072 (78)                        | 2521 (84)                                 | 3231 (89)                         |
| <b>Neglected Roles</b>     | 5285 (66)                        | 769 (56)                         | 1908 (63)                                 | 2608 (72)                         |
| <b>Withdrawal</b>          | 6073 (76)                        | 887 (65)                         | 2225 (74)                                 | 2961 (82)                         |
| <b>Tolerance</b>           | 5473 (69)                        | 777 (57)                         | 2012 (67)                                 | 2684 (74)                         |
| <b>Larger Amounts Used</b> | 7060 (88)                        | 1120 (82)                        | 2618 (87)                                 | 3322 (92)                         |
| <b>Attempts Quit</b>       | 7425 (93)                        | 1278 (93)                        | 2783 (93)                                 | 3364 (93)                         |
| <b>Time Spent</b>          | 6626 (83)                        | 1060 (78)                        | 2445 (81)                                 | 3121 (86)                         |
| <b>Physical Problems</b>   | 7114 (89)                        | 1128 (83)                        | 2653 (88)                                 | 3333 (92)                         |
| <b>Activities given up</b> | 6161 (77)                        | 940 (69)                         | 2260 (75)                                 | 2961 (82)                         |
| <b>Craving</b>             | 5800 (73)                        | 835 (61)                         | 2135 (71)                                 | 2830 (78)                         |

Note. CoUD = Cocaine use disorder, PSA = Polysubstance addiction.



**Table S7. Number of Cocaine use disorder criteria endorsed in the Full-CoUD sample and in the CoUD Subgroups, related to Figure 1.**

| <b>Count,<br/>n (%)</b> | <b>Full CoUD<br/>sample<br/>(n=7989)</b> | <b>Low-PSA<br/>Subgroup<br/>(n=1367)</b> | <b>Intermediate-<br/>PSA Subgroup<br/>(n=3006)</b> | <b>High-PSA Subgroup<br/>(n=3616)</b> |
|-------------------------|------------------------------------------|------------------------------------------|----------------------------------------------------|---------------------------------------|
| 1                       | 0 (0)                                    | 0 (0)                                    | 0 (0)                                              | 0 (0)                                 |
| 2                       | 213 (3)                                  | 73 (5)                                   | 82 (3)                                             | 58 (2)                                |
| 3                       | 267 (3)                                  | 78 (6)                                   | 112 (4)                                            | 77 (2)                                |
| 4                       | 335 (4)                                  | 96 (7)                                   | 149 (5)                                            | 90 (2)                                |
| 5                       | 378 (5)                                  | 94 (7)                                   | 168 (6)                                            | 116 (3)                               |
| 6                       | 444 (6)                                  | 121 (9)                                  | 166 (6)                                            | 157 (4)                               |
| 7                       | 589 (7)                                  | 114 (8)                                  | 243 (8)                                            | 232 (6)                               |
| 8                       | 741 (9)                                  | 145 (11)                                 | 294 (10)                                           | 302 (8)                               |
| 9                       | 1071 (13)                                | 186 (14)                                 | 418 (14)                                           | 467 (13)                              |
| 10                      | 1698 (21)                                | 246 (18)                                 | 637 (21)                                           | 815 (23)                              |
| 11                      | 2253 (28)                                | 214 (16)                                 | 737 (25)                                           | 1302 (36)                             |

Note. CoUD = Cocaine use disorder, PSA = Polysubstance addiction.
